# Supplementary material for: BORDER proteins protect expression of neighboring genes by promoting 3′ Pol II pausing in plants
Source: PubMed Central journal article supplement (PMC6761125; doi:10.1038/s41467-019-12328-w), 2019-09-25
Supplement: 41467_2019_12328_MOESM1_ESM.pdf [file 41467_2019_12328_MOESM1_ESM.pdf]

**Supplementary Materials for**

**BORDER proteins protect expression of neighboring genes by promoting 3' Pol II pausing in plants**

Xuhong Yu<sup>†</sup>, Pascal G.P. Martin<sup>†</sup>, and Scott D. Michaels

**Correspondence to:** [michaels@indiana.edu](mailto:michaels@indiana.edu)

<sup>†</sup>: Equal contribution

**This PDF file includes:**

Supplementary Figures S1 to S9

Supplementary methods and detailed procedures for each supplementary figure

Supplementary references

BDR1 1 MSSNMGTELIIDLETVKADSDAFGETNLMELVGSNDPPSLQHTSVSEIEQEPMEISVSGPL  
 BDR2 1 -----  
 BDR3 1 ---MSNNLLPQPCMQ-----MG-----QFINVP-TPTPELISN-----PEMRLSQPI

BDR1 61 SFQFEPEAVSFQSSMLVDTQSLMPQIQLPYSVERSVAA-CSNSVTGKRKSPPESTLSGSA  
 BDR2 1 -----MEMAETN-GSMQLVGKHKSLPQITLGGGS  
 BDR3 39 CSHISGGRQDE-----H-----VMLPSVVGLGSVNMDKTLIPGKRKSP LHPSVQ---

BDR1 120 TSEKLDASNKRVEPVHHRPWLEQFYSECIQR-----GHMPPPATLSTKTEHLPTPAKKVR  
 BDR2 29 ASEAE-----PNKQVRPWLQQLSPASNGI-----LHIPTK-ILSQETLHSLMHGKKAT  
 BDR3 83 -----NKRMLPMEGRPWASAPMPVQLSSVSPRTQYLPA SFVSKNSFVSFS-----

BDR1 175 QMEFASQKSGKQVMNKKQ-AGLSQGSVKTLDGNESLRSKMKESLAAALALVHEHEE SPK  
 BDR2 75 QTESAPQKPAKPVV NKKQHVPPPQRSVKAMEEVNESVRSKMRSLASALALVKKDD DSPK  
 BDR3 129 -----KPGKQAAARKPTLQ-KPMLLKPQSESSG SVRSKMRSLAGALAMVQCQMDVPN

BDR1 234 EKKNSETEEASVVA---DSNEPASACGTSVTVGEDITPAMSTRDESFEQKNGNGR TISQ  
 BDR2 135 GKENTGTVETPVITQENTQSFQSPASISVVPVGEIMSEMP TSVESVQKD-----S  
 BDR3 181 ESKMLDSETVANPLEGHV-SGPVSAASGVDVMVSNGST EMLTILSDPSPVAG----ISV--

BDR1 291 ESSKDTKMNYVNQSDVQKTQFDEVFPCCDVRFSDSIF TGDPELLQGNGLSWVLEPVSDFG E  
 BDR2 188 EIPVDIMMEDVIKFNVLKSOYDEVFPDRDNPFTDIIF PNDLLHGNELSWDLEV-SDLGE  
 BDR3 234 QTVLPEILSIAKTSDAQVPEAVKPEVQDNVSYSDN VFSKDDLQGNGLSWALES DIEFTV

BDR1 351 N-----ETQKSFEDPELLASKIELELFKLFGGVNKKYKEKGRSLLFNLKDKN  
 BDR2 247 TKDY-----GTGGEKSFQDPKLLASKIEMELKLF GGVNKKYREGRSLLFNLKDKN  
 BDR3 294 NCQNEMIGAMANDGSLEKLLLDPQVLA FEIETELFKLFGGVNKKYKEKGRSLLFNLKDKS

BDR1 398 NPELRESVMGKISPERLCNMTAEELASKELSQRQAKAEEMAEMVVL RDTDIDVRNLVLR  
 BDR2 299 NPELREVMSEETISAERLCSMTAEELASKELSQRQAKAEEMAKMVVLQD TTDIDVRSVLR  
 BDR3 354 NPKLREKVMYGEIAAERLCSMSAEELASKELAEWRQAKAEEMAQMVVLQD TEVDIRSLVR

BDR1 458 KTHKGEFQVEIDPVDSGTVDVSAEITNSNKPRAKAKSSKSS TKATLKKNDSNDKNIKSNQ  
 BDR2 359 KTHKGEFQVEIEPVDRGTVDVSGGIMSRSKRRPRAKSHSVKT--AL KDEAAK-----AD  
 BDR3 414 KTHKGEFQVEVEPMDSGSVEVSVGMSSINWSRTKNFKKTP--SITKT-----L

BDR1 518 GTSSAVTLPPTEEIDPMQGLSMDDMKD-VGFLPPIVSLDEFMESLN SEPPFGSPHEHPP  
 BDR2 411 NEKSRSTPPSTEEIDPMQGLGIDDEIKD-VEFLPPIVSLDEFMESLD SEPPFESPHGNSE  
 BDR3 461 GVK-NELNSSNESTGPIINGVTIDDEMQAATGSLPPIVSLDEFMSSID SESPSGFLSSDTE

BDR1 577 GKEDPASEKSDSKDGS HSKSPSRSPKQ----SPK-----EPSESVSSKTELEKTNVISP  
 BDR2 470 MQVSP-SEKSDSEAGSDSKSPKGS-----PK-----ELSDKSLPEAKPEKIDEVITP  
 BDR3 520 KKPSV-SDNNDVEE-VLVSSPKESANIDLCTSPVKAEALSPLTAKASSPVNAEDADIVSS

BDR1 627 KPDAGDQLDGDVSKPENTSLVDSIKE DRIWDGILQLSSASVVSVTGIFKSGEKAKTSEWP  
 BDR2 515 EFDANVKVDDDISRVEKAAALSDDKGERAWDGILQLSMSSVVPVAGIFKSGEKAKTSEWP  
 BDR3 578 KPSSD-----LKSKTTSVFIPDGERIWEGLQLSPSTVSSVIGILRSGEKTTTK EWP

BDR1 687 TMVEVKGRVRLSAFGKFKELPLSRSRVLMVMNVCKNGISQSQRDSLIEVAKSYVADQR  
 BDR2 575 AMVEVKGRVRLSCFGKFIQELPKSRIRALMVMYIAYKDGISESQRGSLIEVIDSYVADQR  
 BDR3 630 ILLEIKGRVRLDAFEK FVRELPNRSRAVMVMCFVCKEESKTEQENISEVVD SYAKDGR

```

BDR1 747 VGYAEP TSGVELYLCPTLGETLDLLSKIISKDYLDDEVKCELDIGLIGVVVWRRAVVASPG
BDR2 635 VGYAEPASGVELYLCPTRGETLDLLNKVISQEQOLDEVKS-LDIGLVGVVWRRAVVPKPG
BDR3 690 VGYAEPASGVELYLCPTRGRITVEILNKIVPRNQDLFLKSINDDGLIGVVVWRRPQFKKSP

BDR1 807 SRHKPGFKRQHSSTGKRSVLAPENQKSRSVSVTNPSVNVESMRNHGLVGCDDDEDM
BDR2 694 SGSKRQHSF-SSSIGSKTSVL-EVNNKQRVHVTEKPLVVASMRNHHGKGVKHDTAADDDV
BDR3 750 LSNNSHKN--HRE---KGS-----SLTTYNTSRYSNMLQVNNDDGDDV

BDR1 866 PPGFGPVA--AKDDDDLPEFNFNSSSGPVTSSPRPPLQSRSLDQVRELILKYGNSTGSGS
BDR2 752 PPGFGPVA--SRDEDDLPEFNFNSSVVPVSSPQPLPAQSKSLDQVRKLIHKYGKSAST--
BDR3 788 PPGFGPMTMARDEDDLPEFNYSFSSGDVVVNRT-----SRSVSVRELIQKYGKSEPLRN

BDR1 924 KRPWDGHDDDDDDDIPEWQPQLPP-----PPFDLSPQFHSGMTARPPAQRPVAGPPSGWK
BDR2 808 -----YDDDDDEDDIPEWQPHVPSHQLPPPPP-PLGFR-----P---EVFRPPQDGWY
BDR3 842 Q----SYNDNDNDIPEWQPQSNWTLG-----VTHVNGGS-----MVRPCSEWW

BDR1 979 ANQNA PRQQQYSA--RNRGF
BDR2 853 DNQNGSGQH YERNQSRNRGF
BDR3 882 SHQDGRGGY-----

```

**Supplementary Figure 1. Protein alignment of BDR proteins. Alignment generated by CLUSTAL O (1.2.4).**

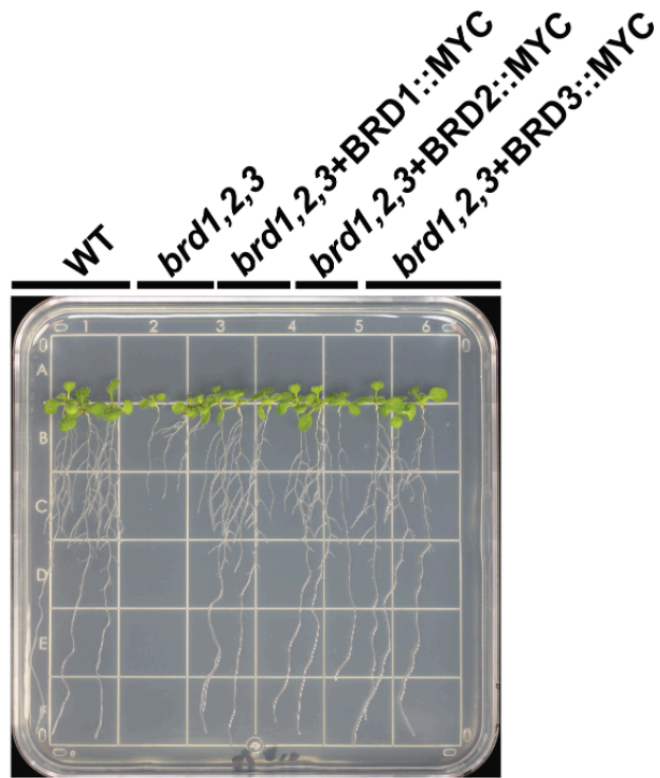

**Supplementary Figure 2. Rescue of *brd1,2,3* root growth using MYC-tagged BDR1, BDR2, and BDR3 constructs.**

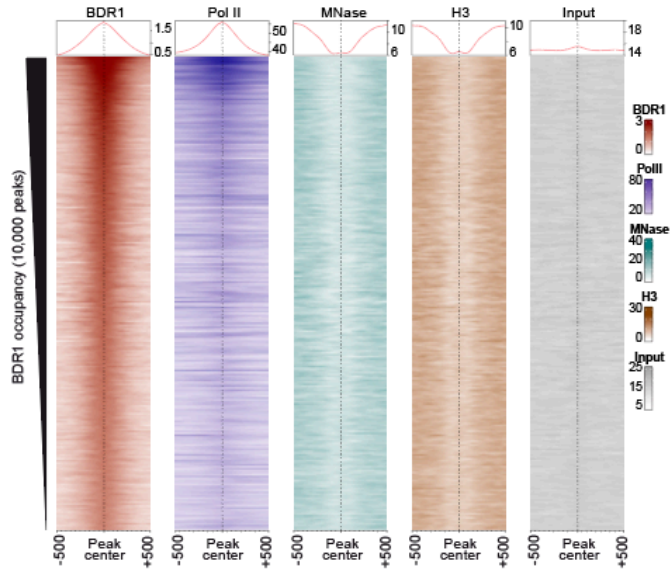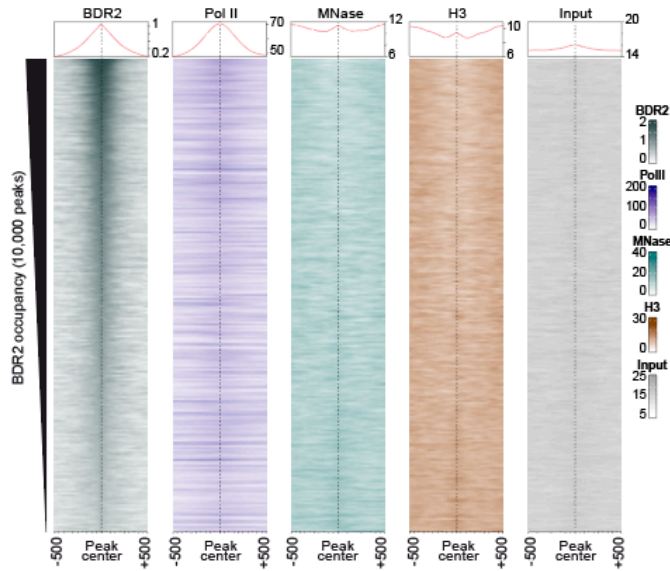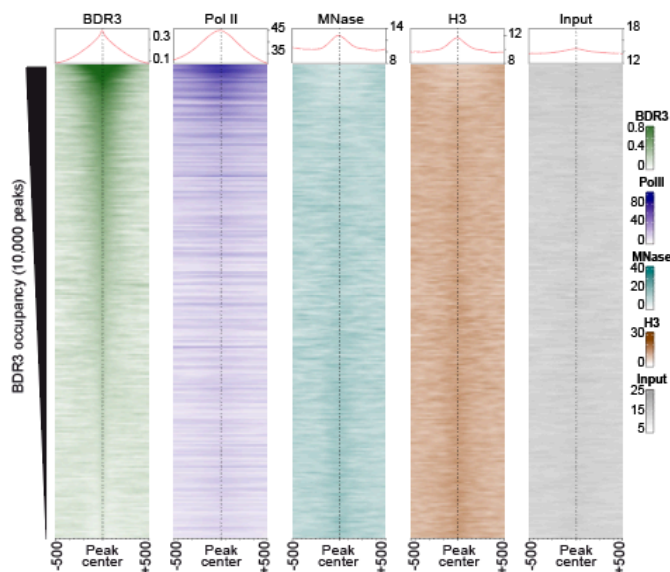

**Supplementary Figure 3. BDR protein colocalize with Pol II.** Correlation of BDR1, BDR2, and BDR3 occupancy and other genomic features. Heatmap and average profiles (top) of ChIP-seq or MNase-seq signals around BDR peaks sorted by levels of BDR occupancy; the top 10,000 regions are shown.

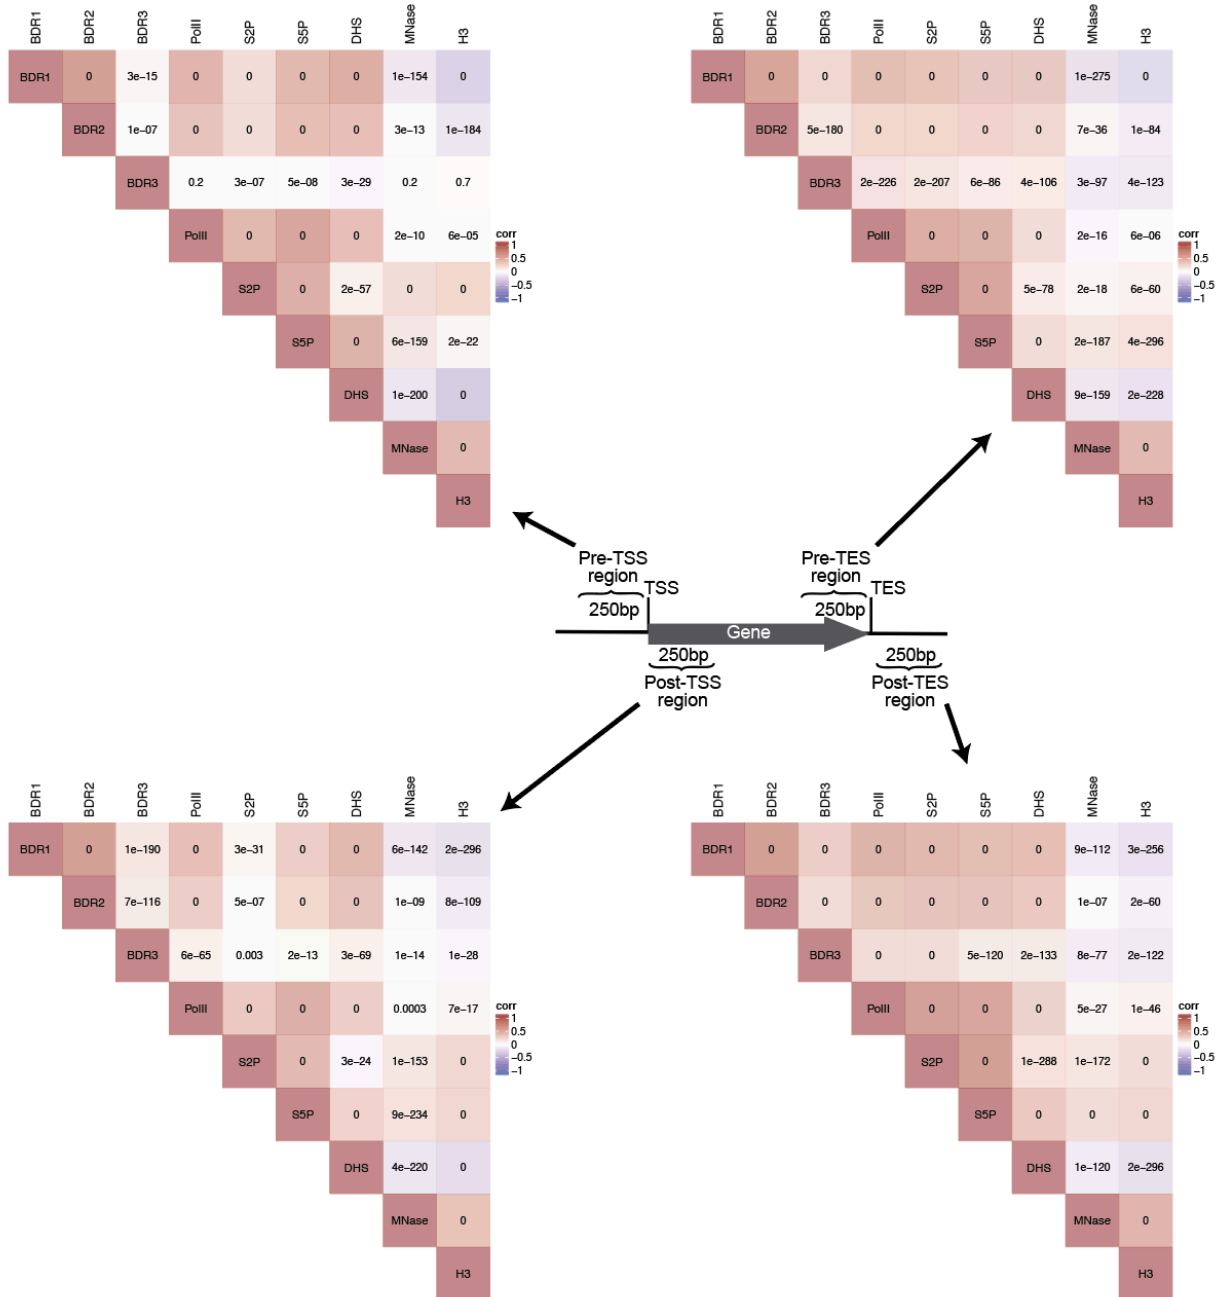

**Supplementary Figure 4. Correlation between genomic features in 250bp regions immediately before the TSS, after the TSS, before the TES, and after the TES.** Strength of the correlation is shown by color and corrected p values are shown. p values < 1e-300 are shown as 0.

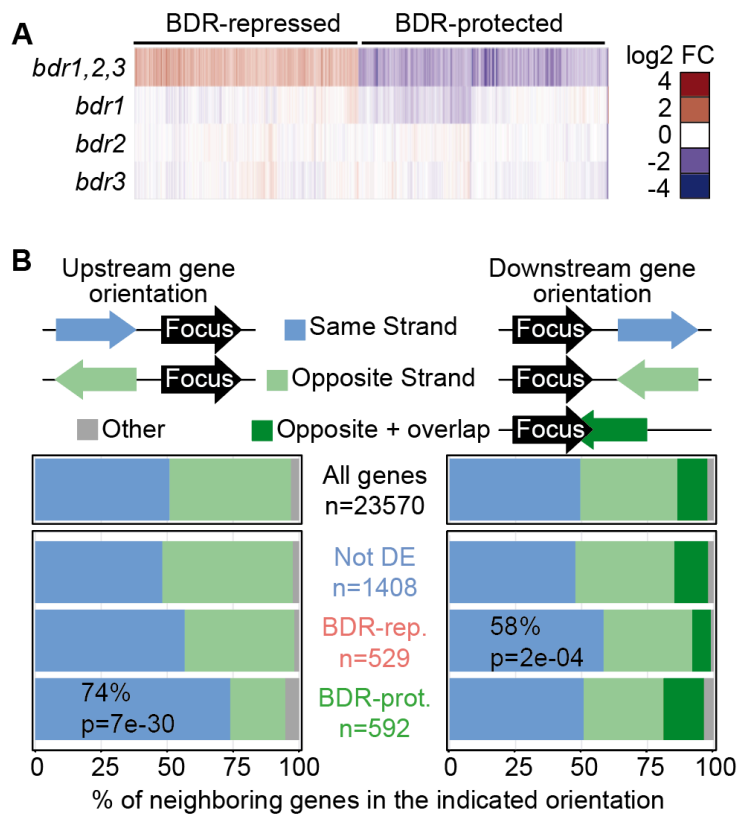

**Supplementary Figure 5. BDR-protected genes occur in a specific genomic context.**

A) Identification of BDR-protected (downregulated in *bdr1,2,3*) and BDR-repressed (upregulated in *bdr1,2,3*) genes by RNA-seq analysis (Supplementary Data 1, Table S2).

B) BDR-protected genes preferentially have an upstream gene on the same strand. Orientation of upstream and downstream neighbors of all expressed genes, non-differentially expressed control genes, or BDR-protected genes. Enrichment for a given orientation is evaluated by Fisher exact test with a BH p-value correction. Adjusted p-values below 0.01 are shown.

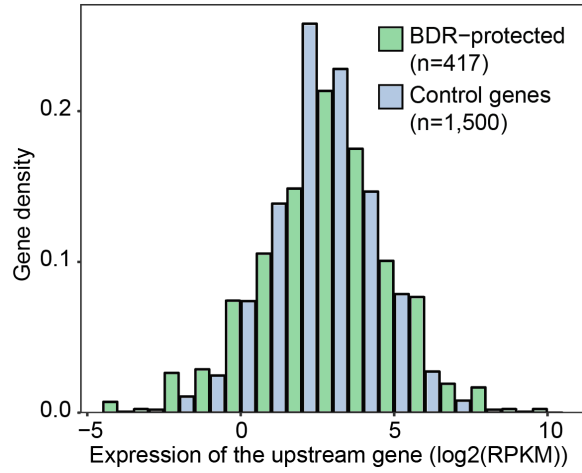

**Supplementary Figure 6. Expression of a control set of 1,500 genes that were selected to have a similar expression distribution to the upstream neighbors of BDR-protected genes in Arabidopsis seedlings.**



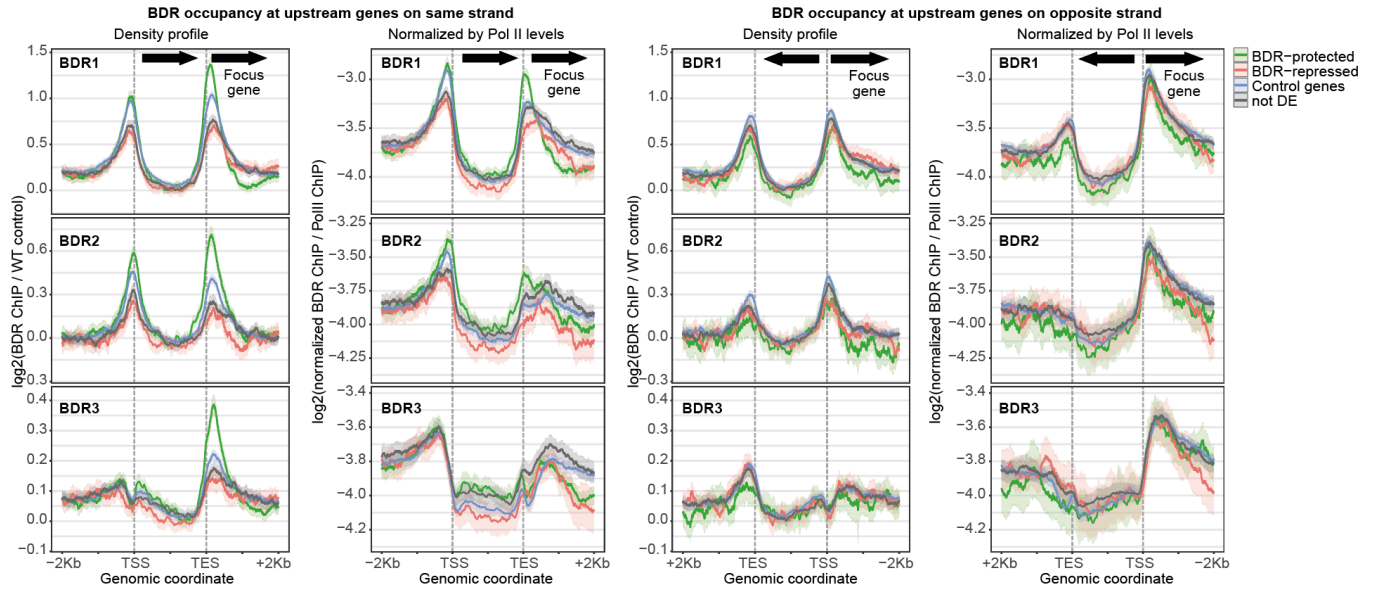

**Supplementary Figure 7. BDR protein enrichment at the borders of the tandem upstream neighbors of BDR-protected genes.**

Metagene profiles of BDR1 and BDR2 ChIP-seq coverage for the upstream neighbors of BDR-protected, BDR-repressed, expression-matched control genes, and non-differentially expressed genes. BDR ChIP-seq data is presented as wild-type-normalized read density and following normalization to Pol II.

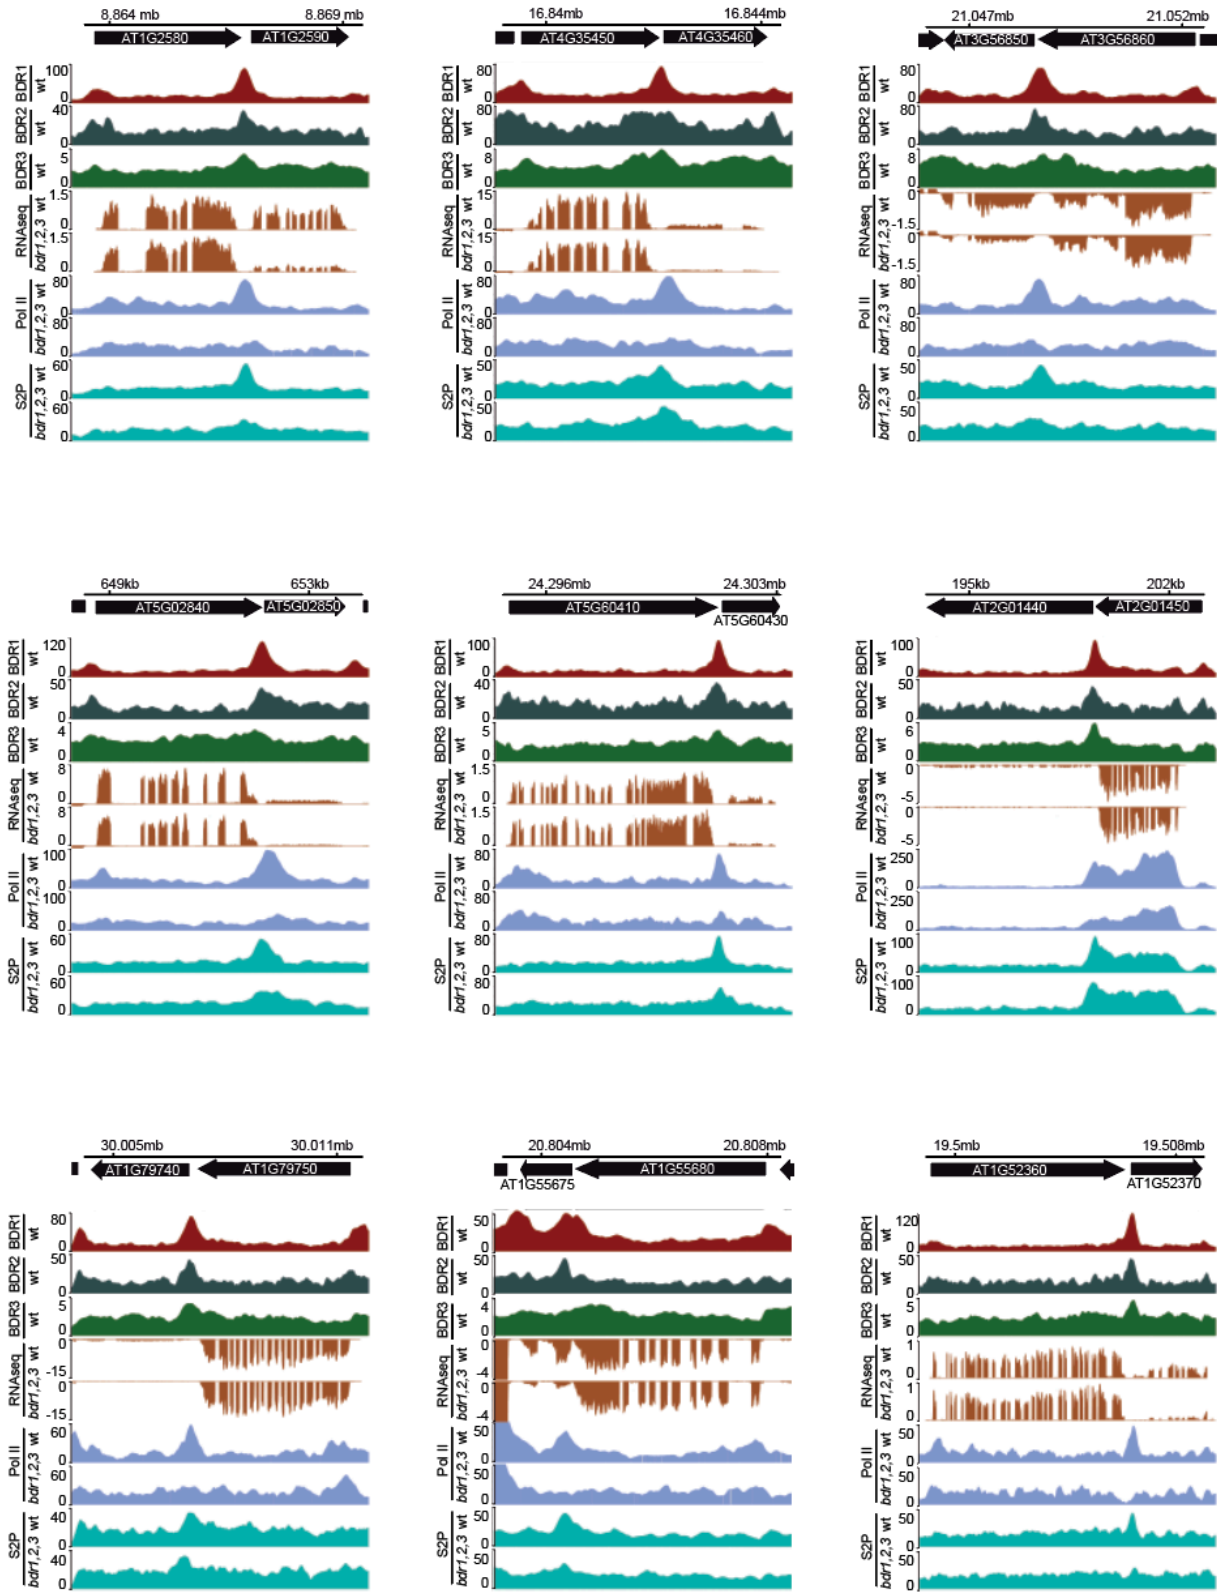

Supplementary Figure 8. Genome browser tracks showing BDR-protected genes and their upstream neighbors.

### Enrichment of AraCyc pathways in genes with reduced expression in *bdr1,2,3*

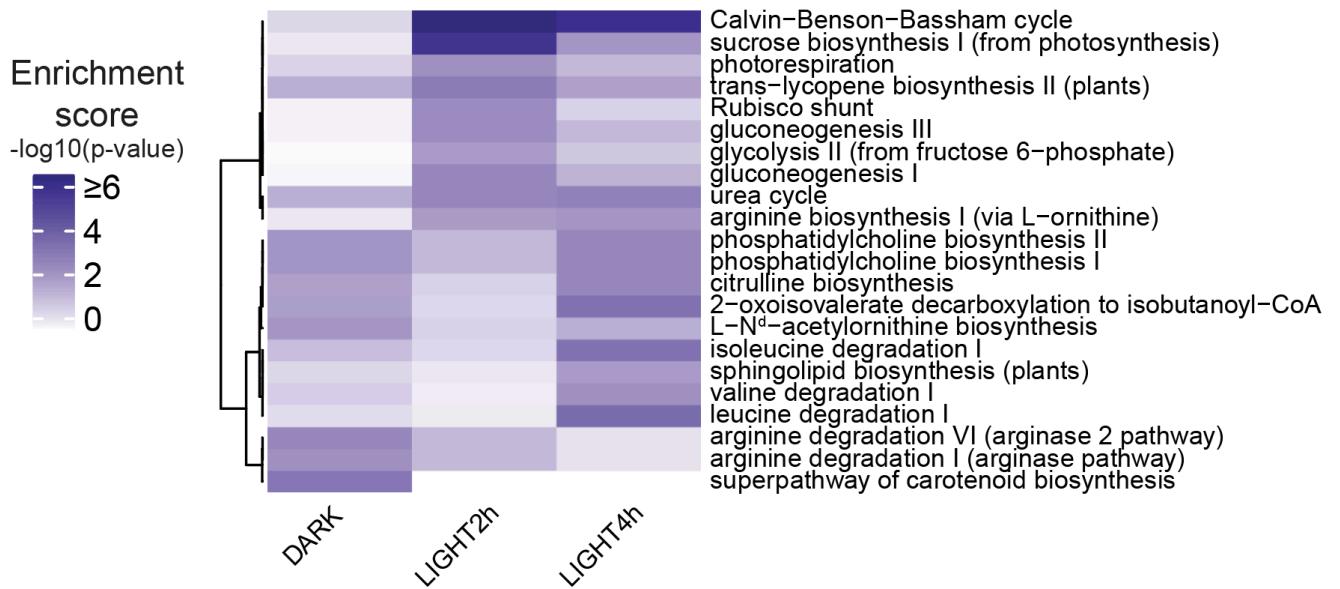

#### Supplementary Figure 9. Biochemical pathway analysis of genes showing reduced induction in *bdr1,2,3*.

For each condition (dark, light 2h or light 4h), we selected genes that showed significantly lower expression in *bdr1,2,3* compared to wild type. These genes were analyzed with the goseq Bioconductor package to determine the enrichment ( $p < 0.01$ , at least 3 DE genes in the pathway) of AraCyc pathways ([www.plantcyc.org](http://www.plantcyc.org)). Enrichment scores were plotted as a heatmap ( $-\log_{10}(\text{p-value})$ ) for all pathways that were significantly enriched in at least one condition. The rows/pathways were reordered by hierarchical clustering using Euclidean distance and Ward agglomeration criterion. This analysis shows that several genes in the Calvin-Benson-Bassham cycle display an altered induction in the *bdr1,2,3* mutant compared to wild-type plants.

### Supplementary bioinformatic methods for each figure

Supplementary Figure 1. Protein sequences for BDR1, BDR2 and BDR3 were aligned using Clustal Omega version 1.2.4<sup>1</sup>.

Supplementary Figure 3.

For each BDR::MYC ChIP-seq, we sorted the top 10,000 peaks by decreasing level of normalized coverage near the peak summit ( $\pm 100$ bp around peak summit). We then represented as heatmaps the signal obtained around these peaks ( $\pm 500$ bp) for the BDR ChIP-seq (GSE113059 for BDR1 and BDR2 or GSE131772 for BDR3), for Pol II ChIP-seq (GSE113078), for MNase-seq and H3 ChIP-seq (GSE113076) as well as for input DNA from BDR ChIP-seq control (GSE113059).

Supplementary Figure 4. The signal of normalized BDR1, BDR2 and BDR3 ChIP-seq, PolII, S2P and S5P ChIP-seq, DNase hypersensitivity (DHS, GSE34318), MNase-seq and H3 native ChIP-seq was extracted in each region for all expressed protein-coding genes ( $n=21,290$ ) and the Spearman correlation coefficient was calculated (in order to account for possible non-linear relationships). The reported p-values are from a t-test evaluating if the correlations are significantly different from 0 and were corrected for multiplicity by the Benjamini-Hochberg procedure.

Supplementary Figure 5. Panel A. The heatmap was produced with the EnrichedHeatmap package<sup>2</sup> using as input  $\log_2(\text{mutant/wild-type})$  obtained from DESeq2 analysis on a selection of 1124 genes that were significantly up- or downregulated ( $\text{FDR} < 5\%$ ) in at least one of the mutant genotypes (Table S3).

Supplementary Figure 5. Panel B. For all expressed genes (defined by positive read counts in RNA-seq study GSE112441 and after removing genes located at chromosome borders;  $n=23570$ ), for control "Not DE" genes ( $n=1408$ ), and for genes upregulated (BDR-repressed,  $n=529$ ) or downregulated (BDR-protected,  $n=592$ ) in the *bdr1,2,3* triple mutant compared to wild-type plants, we counted the number of upstream genes located on the same strand (blue), on the opposite strand (green) or with an overlapping upstream gene (grey) and calculated the corresponding proportions. We did the same for the downstream gene neighbors, but we also individualized from the "Other" category the frequent situation of an overlapping gene on the opposite strand (dark green). Significance of the enrichment for a given orientation was assessed by a Fisher exact test with a Benjamini-Hochberg (BH) correction. Only adjusted p-values below 0.01 are shown.

Supplementary Figure 6. We sampled 1,500 genes from non-differentially expressed genes having an upstream gene neighbor on the same strand so that the expression distribution of their upstream genes follows a normal distribution with mean and variance identical to the upstream tandem genes of BDR-protected genes. The histograms represent the distribution of the expression levels of these upstream tandem gene neighbors for BDR-protected genes or the control gene set.

Supplementary Figure 7. We analyzed the occupancy of BDR1 (GSE113059), BDR2 (GSE113059) and BDR3 (GSE131772) at genes located upstream, either on the same strand (left plots) or on the opposite strand (right plots) for the following groups of genes: BDR-protected genes, ( $n=592$ ), BDR repressed genes ( $n=529$ ), "Not DE" control genes ( $n=1408$ ) or expression level-matched controls ( $n=1500$  for each orientation). For each orientation of the upstream gene, we plotted metagene profiles representing the ChIP-seq coverage of

BDR::MYC protein normalized by their corresponding wild-type control ChIP only ( $\log_2(\text{BDR ChIP} / \text{WT control})$ ) or also by Pol II (GSE113078) ChIP-seq coverage ( $\log_2(\text{normalized BDR ChIP} / \text{Pol II ChIP})$ ). Average normalized coverages (solid lines) and 95% confidence intervals (shades) are represented.

Supplementary Figure 8. Coverages from ChIP-seq fragments of BDR1::MYC (GSE113059), BDR2::MYC (GSE113059), BDR3::MYC (GSE131772), Pol II (GSE113078) and Pol II S2P (GSE113075) in wild-type and *bdr1,2,3* triple mutant (units: FP10M) and average coverage from RNA-seq (GSE112441) fragments obtained from 3 wild-type or *bdr1,2,3* mutant samples (units: RPM, sign indicating on which strand the reads align) were plotted with the Gviz R package<sup>3</sup> for genomic regions corresponding to 9 BDR-protected genes and their upstream gene neighbor on the same strand.

Supplementary Figure 9. Using the RNA-seq data GSE112442, we identified all genes downregulated in *bdr1,2,3* mutant compared to wild-type under the dark, light 2h or light 4h conditions (DESeq2, FDR<5%). Using Bioconductor goseq package<sup>4</sup> we identified all Aracyc pathways ([www.plantcyc.org](http://www.plantcyc.org)) that were significantly enriched in at least one of these gene sets ( $p < 0.01$  and at least 3 differentially expressed genes in the pathway) and plotted the corresponding  $-\log_{10}(p\text{-value})$  as a heatmap in which rows were re-organized by hierarchical ascending clustering using the Euclidean distance and Ward agglomeration criterion. To limit the effect of extremely low p-values in the heatmap we set the maximum color intensity at  $p\text{-value} = 1e-06$ .

### Supplementary References

1. Sievers, F. et al. Fast, scalable generation of high-quality protein multiple sequence alignments using Clustal Omega. *Mol Syst Biol* **7**, 539 (2011).
2. Gu, Z., Eils, R., Schlesner, M. & Ishaque, N. EnrichedHeatmap: an R/Bioconductor package for comprehensive visualization of genomic signal associations. *BMC Genomics* **19**, 234 (2018).
3. Hahne F, I. Visualizing Genomic Data Using Gviz and Bioconductor. in *Statistical Genomics: Methods and Protocols* (eds. E, M. & S, D.) (Springer New York, New York, 2016).
4. Young, M.D., Wakefield, M.J., Smyth, G.K. & Oshlack, A. Gene ontology analysis for RNA-seq: accounting for selection bias. *Genome Biol* **11**, R14 (2010).
